# Supplementary material
Source: publisher site journal article supplement (https://www.dovepress.com/article/604216)
Supplement: Supplementary file 1 [file 604216%20Revised%20supplementary%20materials.pdf]

**Title:** Controlling symptoms versus minimizing negative treatment impact: A grounded theory study of heterogeneity in patient preferences for psoriasis treatments

**Authors:** Shelagh M. Szabo, MSc; Neil S. Hawkins, PhD; Evi Germani, PhD.

Health Economics & Health Technology Assessment (HEHTA), School of Health and Wellbeing,  
University of Glasgow, Glasgow, Scotland, UK

**Corresponding author:** Shelagh M. Szabo, MSc ([sszabo@broadstreetheor.com](mailto:sszabo@broadstreetheor.com))

**SUPPLEMENTARY MATERIALS**

## Appendix A: Interview guide

### Preference heterogeneity in psoriasis: High-level interview guide by topic

1. Demographic details
  - Age, age at diagnosis
  - Employment status
2. Clinical details
  - Current psoriasis medications
  - Number of other medications
3. Health insurance details
  - Cost sensitivity for paying healthcare
  - Magnitude of co-payments for medication
  - Ever could not afford a medication prescribed / ever told you would not be prescribed a medication due to costs
4. Living with psoriasis
  - Symptom history
  - Progression to moderate psoriasis
  - Impact of psoriasis on daily life / routine
  - Treatment history
  - Most bothersome symptoms
5. Treatments received for psoriasis
  - Initial treatment, and options recommended
  - Preferences for initial treatment and drivers
    - Likes, dislikes, reasons, examples
  - Adherence to initial treatment; how participant takes their medicines
    - Perceived importance of being adherent
  - Reasons for discontinuation (if applicable)
  - Perceived role in effectively managing psoriasis
  - *Repeat for all treatments received*
6. Treatments not received for psoriasis
  - Other treatments of which the participant had heard
  - Reasons interested in other treatments; reasons disinterested
    - Benchmarks for efficacy, safety, other features that the participant would want
7. Agency and autonomy in decision making
  - Preferred level of involvement in psoriasis decision-making
  - Composition of clinical team for psoriasis care
    - Preferred role of clinical team
    - Ideal style of relationship with clinical team
  - Conducting own research into health
    - Preferences for this, sources of information
  - Taking charge of your own health
    - Definition, preferences for this, sources of information
8. Perceived burden of current medication load
  - Importance of reduced medication load
9. Changes to lifestyle to accommodate/manage psoriasis
  - Preferences for this
  - Attempts made

- Perceptions of efficacy
  - Ability to lead a 'normal' life on treatment
10. Preferences for psoriasis treatment attributes
- Most/least important features when selecting a treatment
  - Review importance of / define drivers of treatment preferences
  - Importance of 'convenience'
  - Selecting a treatment that maximizes efficacy or minimizes inconvenience
  - Treatment deal breakers
  - Role of treatment features and preferences in medication adherence

## Appendix B: COREQ checklist

| Topic                                          | Item No. | Guide Questions/Description                                                                                                                                                                                  |
|------------------------------------------------|----------|--------------------------------------------------------------------------------------------------------------------------------------------------------------------------------------------------------------|
| <b>Domain 1: Research team and reflexivity</b> |          |                                                                                                                                                                                                              |
| <i>Personal characteristics</i>                |          |                                                                                                                                                                                                              |
| Interviewer/facilitator                        | 1        | Which author/s conducted the interview or focus group?<br><a href="#">Methods, section 2.3, paragraph 4, line 1</a>                                                                                          |
| Credentials                                    | 2        | What were the researcher's credentials? E.g. PhD, MD<br><a href="#">Methods, section 2.3, paragraph 4, line 1</a>                                                                                            |
| Occupation                                     | 3        | What was their occupation at the time of the study?<br><a href="#">Methods, section 2.3, paragraph 4, line 1</a>                                                                                             |
| Gender                                         | 4        | Was the researcher male or female?<br><a href="#">Methods, section 2.3, paragraph 4, line 1</a>                                                                                                              |
| Experience and training                        | 5        | What experience or training did the researcher have?<br><a href="#">Methods, section 2.3, paragraph 4, line 1</a>                                                                                            |
| <i>Relationship with participants</i>          |          |                                                                                                                                                                                                              |
| Relationship established                       | 6        | Was a relationship established prior to study commencement?<br><a href="#">Methods, section 2.2, paragraph 2, line 3</a>                                                                                     |
| Participant's knowledge of the interviewer     | 7        | What did the participants know about the researcher? e.g. personal goals, reasons for doing the research<br><a href="#">Methods, section 2.2, paragraph 2, line 2</a>                                        |
| Interviewer characteristics                    | 8        | What characteristics were reported about the interviewer/facilitator? e.g. Bias, assumptions, reasons, and interests in the research topic –<br><a href="#">Methods, section 2.5, paragraph 1, lines 2-3</a> |
| <b>Domain 2: Study design</b>                  |          |                                                                                                                                                                                                              |
| <i>Theoretical framework</i>                   |          |                                                                                                                                                                                                              |
| Methodological orientation and Theory          | 9        | What methodological orientation was stated to underpin the study? e.g. grounded theory, discourse analysis, ethnography, phenomenology, content analysis<br><a href="#">Methods, section 2.1, lines 2-3</a>  |
| <i>Participant selection</i>                   |          |                                                                                                                                                                                                              |
| Sampling                                       | 10       | How were participants selected? e.g. purposive, convenience, consecutive, snowball<br><a href="#">Methods, section 2.2, paragraph 1, line 1</a>                                                              |
| Method of approach                             | 11       | How were participants approached? e.g. face-to-face, telephone, mail,<br><a href="#">Methods, section 2.2, paragraph 2, line 1</a>                                                                           |
| Sample size                                    | 12       | How many participants were in the study?<br><a href="#">Results, section 3.1, paragraph 1, line 1</a>                                                                                                        |
| Non-participation                              | 13       | How many people refused to participate or dropped out? Reasons?<br><a href="#">Results, section 3.1, paragraph 1, line 1</a>                                                                                 |
| <i>Setting</i>                                 |          |                                                                                                                                                                                                              |
| Setting of data collection                     | 14       | Where was the data collected? e.g. home, clinic, workplace<br><a href="#">Methods, section 2.3, paragraph 2, line 1</a>                                                                                      |
| Presence of non-participants                   | 15       | Was anyone else present besides the participants and researchers?<br><a href="#">Methods, section 2.3, paragraph 2, line 8</a>                                                                               |

|                                        |    |                                                                                                                                                                                               |
|----------------------------------------|----|-----------------------------------------------------------------------------------------------------------------------------------------------------------------------------------------------|
| Description of sample                  | 16 | What are the important characteristics of the sample? e.g. demographic data, date<br><a href="#">Results, section 3.1, paragraph 1, figure 1, and table 1.</a>                                |
| <i>Data collection</i>                 |    |                                                                                                                                                                                               |
| Interview guide                        | 17 | Were questions, prompts, guides provided by the authors? Was it pilot tested?<br><a href="#">Appendix A and Methods, section 2.3, paragraph 1, line 1.</a>                                    |
| Repeat interviews                      | 18 | Were repeat interviews carried out? If yes, how many?<br><a href="#">Methods, section 2.3, paragraph 2, line 8</a>                                                                            |
| Audio/visual recording                 | 19 | Did the research use audio or visual recording to collect the data?<br><a href="#">Methods, section 2.3, paragraph 2, line 7</a>                                                              |
| Field notes                            | 20 | Were field notes made during and/or after the interview or focus group? –<br><a href="#">Methods, section 2.3, paragraph 2, line 6</a>                                                        |
| Duration                               | 21 | What was the duration of the interviews or focus group?<br><a href="#">Methods, section 2.3, paragraph 2, line 7</a>                                                                          |
| Data saturation                        | 22 | Was data saturation discussed?<br><a href="#">Methods, section 2.3, paragraph 4, line 3</a>                                                                                                   |
| Transcripts returned                   | 23 | Were transcripts returned to participants for comment and/or correction? -<br><a href="#">Methods, section 2.3, paragraph 2, line 5</a>                                                       |
| <b>Domain 3: analysis and findings</b> |    |                                                                                                                                                                                               |
| <i>Data analysis</i>                   |    |                                                                                                                                                                                               |
| Number of data coders                  | 24 | How many data coders coded the data?<br><a href="#">Methods, section 2.3, paragraph 4, line 1</a>                                                                                             |
| Description of the coding tree         | 25 | Did authors provide a description of the coding tree?<br><a href="#">Methods section 2.3, paragraph 3, and Figures 2 and 3</a>                                                                |
| Derivation of themes                   | 26 | Were themes identified in advance or derived from the data?<br><a href="#">Methods section 2.3, paragraph 3, line 3</a>                                                                       |
| Software                               | 27 | What software, if applicable, was used to manage the data?<br><a href="#">Methods section 2.3, paragraph 3, line 2</a>                                                                        |
| Participant checking                   | 28 | Did participants provide feedback on the findings?<br><a href="#">Methods, section 2.3, paragraph 2, line 5</a>                                                                               |
| <i>Reporting</i>                       |    |                                                                                                                                                                                               |
| Quotations presented                   | 29 | Were participant quotations presented to illustrate the themes/findings? Was each quotation identified? e.g. participant number<br><a href="#">Yes, throughout the results and in Table 2</a> |
| Data and findings consistent           | 30 | Was there consistency between the data presented and the findings?<br><a href="#">Yes, throughout the results and in Table 2 and Figures 2 and 3</a>                                          |
| Clarity of major themes                | 31 | Were major themes clearly presented in the findings?<br><a href="#">Figure 3</a>                                                                                                              |
| Clarity of minor themes                | 32 | Is there a description of diverse cases or discussion of minor themes?<br><a href="#">Figure 2 and Results sections 3.4, 3.5 and 3.6</a>                                                      |
